# Supplementary material for: Compositional and structural control of tenebrescence
Source: Royal Society of Chemistry journal article supplement (doi:10.1039/c0jm02066d), 2010-01-01
Supplement: c0jm02066d.pdf [file c0jm02066d.pdf]

Supplementary Information

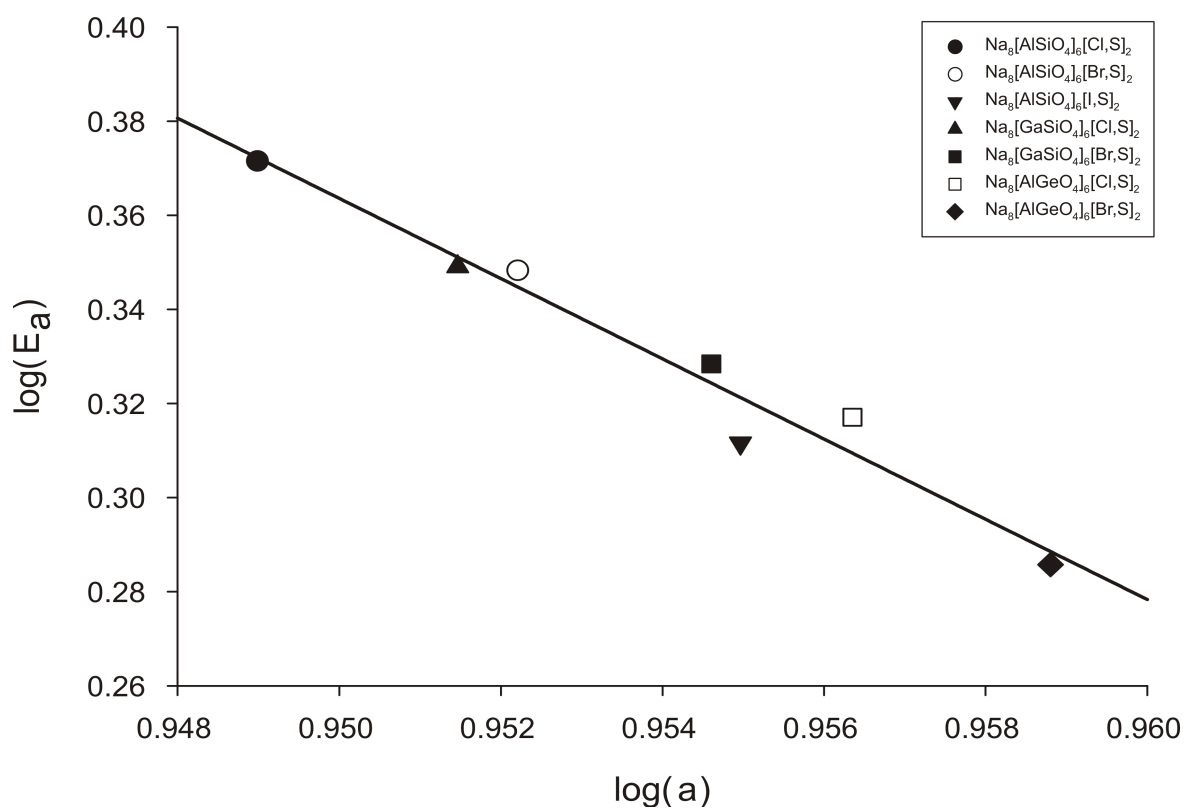

**Figure S1.** Plot of  $\log(E_a)$  versus  $\log(a)$  for sodium sodalites . The relationship between  $E_a$  and  $a$  determined from this plot is:

$$E_a = 2.89 \times 10^8 a^{-2.23}$$

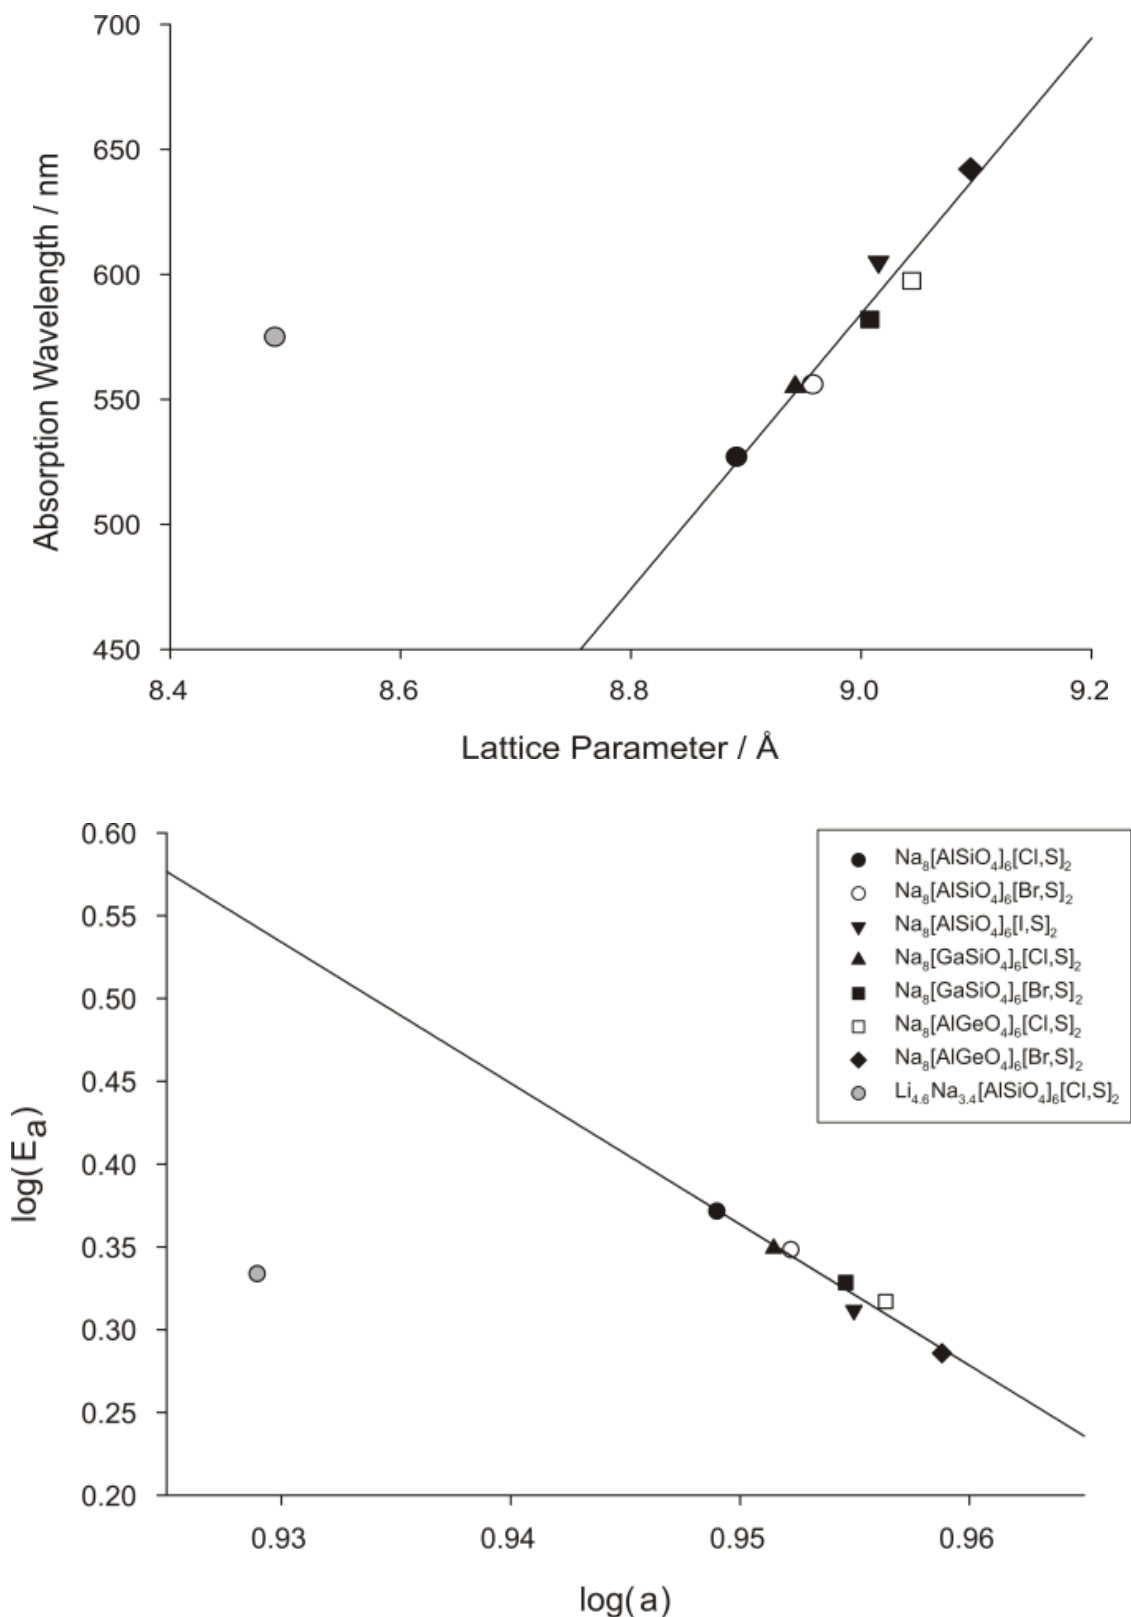

**Figure S2.** Top: Absorption wavelength versus lattice parameter, including lithium substituted synthetic hackmanite. Bottom:  $\log(E_a)$  versus  $\log(a)$  including lithium substituted synthetic hackmanite. Regression lines fit only the sodium sodalites.

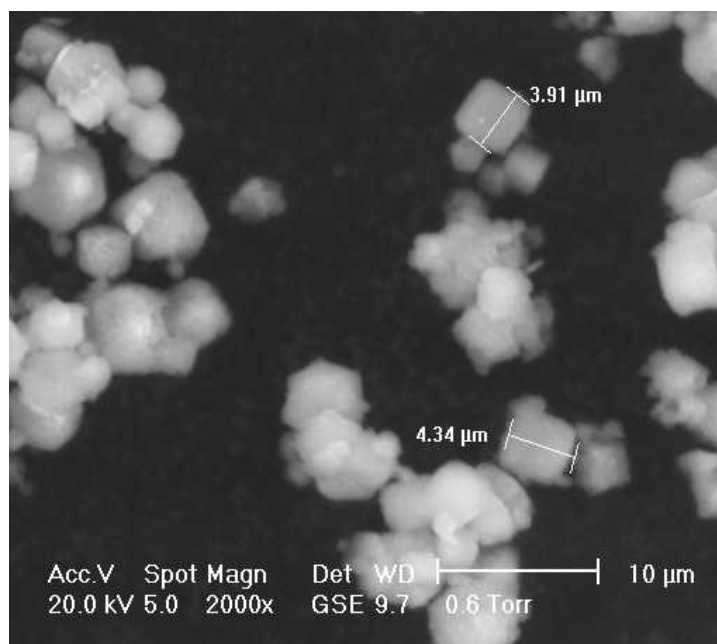

**Figure S3.** Micrograph of synthetic hackmanite,  
 $\text{Na}_8[\text{AlSiO}_4]_6[\text{Cl}, \text{SO}_m, \text{S}_n, \square]_2$
